# Supplementary material for: Sex-specific maternal effects in a viviparous fish
Source: PubMed Central journal article supplement (PMC4571680; doi:10.1098/rsbl.2015.0472), 2015-08
Supplement: rsbl20150472supp1.pdf [file rsbl20150472supp1.pdf]

# 1 **Sex-specific maternal effects in a viviparous fish**

2 Loeske E. B. Kruuk, Julianne Livingston, Andrew Kahn and Michael D. Jennions

## 3 **Supplementary Information**

### 4 **Methods**

#### 5 *Fish rearing*

6 We reared mosquitofish (*Gambusia holbrooki*) in our laboratory at the Australian National  
7 University. We used a standard full/half-sib breeding design, in which 80 virgin dams were  
8 mated to 20 sires, and offspring were then reared individually. Half of the fry from each of the  
9 full-sib families were raised in normal growth conditions, whereas the other half experienced an  
10 early period of food deprivation. The effects of this food deprivation treatment on juvenile  
11 growth rates, compensatory growth and adult traits are reported in [1], where our experimental  
12 set-up is described in more detail. Here we recap the main features.

13 *Gambusia* females can viably store sperm for several months to produce mixed paternity  
14 broods. We therefore only used virgin females in the breeding experiment. First generation lab-  
15 born females from the Canberra Lakes stock population (caught in April/May 2010) were raised  
16 individually to provide dams for breeding. Sires were randomly selected from the Canberra  
17 Lakes stock. Initially, each of 20 sires was mated to four virgin dams (N = 80 pairings). Gravid  
18 females were checked daily for offspring. In total, 69 dams produced viable offspring from 19  
19 sires. On the day of birth, up to 10 siblings from each brood were chosen at random, measured,  
20 and housed individually in 1 litre aquaria. Up to five offspring from each dam were placed in  
21 'control' and 'treatment' rearing conditions. Offspring in the control group were fed a typical lab  
22 diet of brine shrimp *ad libitum* twice daily from birth until the end of the experiment. Offspring  
23 in the treatment group were initially fed at the same level for 7 days, after which their feeding  
24 was reduced to ~3 mg brine shrimp every second day for 21 days, and then they were returned  
25 to normal food levels. In the food-deprivation treatment group, females seemed 'better' than

26 males at catching up in size without having to delay maturation, suggesting a sex difference in  
27 compensatory growth [1]. Each offspring was reared individually, so the only shared  
28 environment was due to maternal effects and treatment type. Sickly offspring (identified by  
29 external growth of bacteria) and those with spinal curvature were excluded from the study.  
30 Partial and full water changes were made as required; excess food was not removed on a daily  
31 basis, but the amounts provided were such that food did not build up. There was no excess food  
32 during the 7-28 treatment period for the low food group.

33 The analysis presented here focused on sources of variation in adult traits in N=297 females  
34 and 303 males that reached sexual maturity. We defined females as sexually mature by the  
35 presence of yellow colouration in their egg sacs, which are visible through the body wall, and  
36 males when we could detect a clear apical hook at the gonopodium tip [see 1]. We recorded five  
37 adult traits: age (in days) and body length at sexual maturity in each sex, and gonopodium  
38 length in males. The standard length (snout to base of the caudal fin, in mm) of each fish was  
39 measured from photographs of fish briefly immobilised in cold water. Fish were placed in a  
40 Petri dish filled with water, aligned alongside a microscopic ruler (0.1mm gradations), and  
41 photographed using a digital camera attached to a dissecting microscope. We used ImageJ  
42 software [2] to measure their SL. We re-measured 200 randomly selected photos to confirm  
43 that our length measurements were repeatable ( $r > 0.95$ ,  $P < 0.0001$ ). Gonopodium length was  
44 measured as apical tip to base, in mm, in all males that were alive after 150 days (N = 261 males;  
45 we only measured this subset of males due to logistic constraints).

## 46 **Statistical analyses**

47 We fitted multivariate mixed models to the five traits in ASReml-R [3]. Summary statistics,  
48 sample sizes and the phenotypic variance-covariance matrix for the five traits are given in Table  
49 S1. All traits were first standardized to unit variance prior to analysis. We fitted *treatment* (as  
50 described above, control vs restricted) as a binary fixed effect in all models. *Row* (shelf height in  
51 the lab) was also fitted as a fixed effect (a 10-level factor), to account for any spatial variation in

52 lab conditions associated with this aspect of the spatial configuration of the room. We then  
53 quantified components of variance and covariance in the traits using a multivariate “animal  
54 model” [4], with random effects of an additive genetic effect (with covariance structure defined  
55 by relatedness between individuals) and a maternal effect [grouping individuals by mother, 5].

56 Because of the food treatment to test for effects of compensatory growth, we also considered a  
57 treatment-x-maternal effects interaction, to test whether maternal effects were consistent  
58 across treatments. These interactions were never significant ( $p > 0.20$  for all traits). Similarly,  
59 cross-treatment maternal effects correlations were never significantly different from 1. As there  
60 was therefore no indication that the maternal effects variance in the restricted food treatment  
61 was any different from that in the control treatment, we combined data from the two treatments  
62 (and simply included *treatment* as a fixed factor as described above, to correct for any  
63 differences in means).

64 Finally, in addition to the five-trait models of sex-specific traits, we fitted a bivariate model to  
65 see what level of maternal effects variance would have been estimated had we ignored the sex-  
66 specific nature of the trait variation. This model contained the two traits of length and age at  
67 sexual maturity (i.e. not split by sex). Sex was included as a fixed effect (additional to row and  
68 treatment) to correct for differences between the trait means; maternal, additive genetic and  
69 residual effects were fitted as random effects. As we report in the Discussion, this model  
70 returned substantially lower estimates of the maternal effects variance for body length and age  
71 at maturity. Adding a sex interaction term to the random effects of this model resulted in a  
72 significant improvement to the likelihood ( $p < 0.001$ ), further confirming the sex-specific nature  
73 of the variance.

#### 74 **Power analyses**

75 We used simulations to investigate the statistical power to detect significant additive genetic  
76 variance ( $V_a$ ) in the two traits for which we observed non-zero estimates of  $V_a$ , gonopodium  
77 length and female age at maturity. We used the R package *pedantics* [6] to simulate phenotypes

78 with our pedigree structure and the observed levels of additive genetic and residual variance  
79 (Table 1), and then added a maternal effect common to all offspring of each mother, drawn from  
80 a normal distribution, again with the estimate of variance for maternal effects as observed  
81 (0.556 and 0.353 respectively for the two traits). We then ran univariate animal models on the  
82 simulated data for each trait. The significance of the estimate of additive genetic variance was  
83 estimated using a likelihood ratio test of a model fitting  $V_a$ ,  $V_m$  and  $V_r$  versus one with just  $V_m$   
84 and  $V_r$ , and the process repeated 1000 times. Estimates of statistical power were calculated as  
85 the proportion of runs (out of 1000) for which the p-values were less than 0.01. These were  
86 0.098 and 0.122 for the two traits, i.e. indicating low statistical power to estimate additive  
87 genetic variance in the presence of the substantial maternal effects variance observed.

## 88 References

- 89 [1] Livingston, J.D., Kahn, A.T. & Jennions, M.D. 2014 Sex differences in compensatory and catch-  
90 up growth in the mosquitofish *Gambusia holbrooki*. *Evolutionary Ecology* **28**, 687-706.  
91 (doi:10.1007/s10682-014-9691-1).
- 92 [2] Abramoff, M.D., Magelhaes, P.J. & Ram, S.J. 2004 Image processing with ImageJ. *Biophotonics*  
93 **11**, 36-42.
- 94 [3] Butler, D.G., Cullis, B.R., Gilmour, A.R. & Gogel, B.J. 2009 ASReml-R reference manual.  
95 (<http://www.vsni.co.uk/downloads/asreml/release3/asreml-R.pdf>).
- 96 [4] Wilson, A.J., Reale, D., Clements, M.N., Morrissey, M.M., Postma, E., Walling, C.A., Kruuk, L.E.B.  
97 & Nussey, D.H. 2010 An ecologist's guide to the animal model. *Journal of Animal Ecology* **79**, 13-  
98 26. (doi:10.1111/j.1365-2656.2009.01639.x).
- 99 [5] Kruuk, L.E.B. & Hadfield, J.D. 2007 How to separate genetic and environmental causes of  
100 similarity between relatives. *J. Evolutionary Biology* **20**, 1890-1903.
- 101 [6] Morrissey, M.B., Wilson, A.J., Pemberton, J.M. & Ferguson, M.M. 2007 A framework for power  
102 and sensitivity analyses for quantitative genetic studies of natural populations, and case studies  
103 in Soay sheep (*Ovis aries*). *J. Evolutionary Biology* **20**, 2309-2321.

104

## Supplementary Table

**Table S1. Summary statistics and overall phenotypic covariances**

Summary statistics, sample sizes and the matrix of phenotypic variances and covariances from the multivariate model of length (mm) and age at sexual maturity (age SM, in days) in both sexes and male gonopodium length (mm). Variance estimates on diagonal, covariances below diagonal and correlations above diagonal (all with SEs in brackets). All traits were standardised to unit variance prior to analysis, but estimates of phenotypic variance may be <1 due to fixed effects in the model. Cross-sex covariances/correlations cannot be estimated at the phenotypic level, hence blank cells. P-values are from likelihood ratio tests comparing the full model to one in which the relevant covariance component is constrained to zero.

|                | body length: male | age SM: male      | gonopodium length: male | body length: female | age SM: female    |
|----------------|-------------------|-------------------|-------------------------|---------------------|-------------------|
| Mean (SD)      | 22.50 (1.37)      | 78.17 (18.83)     | 6.30 (0.47)             | 24.78 (1.59)        | 97.78 (19.47)     |
| N              | 303               | 303               | 261                     | 297                 | 297               |
|                | length_male       | age_male          | gonopodium_length_male  | length_female       | age_female        |
| length: male   | 0.961 (0.080)     | 0.786 (0.022) *** | 0.682 (0.033) ***       | .                   | .                 |
| age SM: male   | 0.730 (0.069) *** | 0.898 (0.074)     | 0.531 (0.045) ***       | .                   | .                 |
| gonopodium     | 0.663 (0.071) *** | 0.499 (0.065) *** | 0.984 (0.087) ***       | .                   | .                 |
| length: female | .                 | .                 | .                       | 0.917 (0.077)       | 0.700 (0.030) *** |
| age SM: female | .                 | .                 | .                       | 0.674 (0.069) ***   | 1.010 (0.084)     |

\*\*\*p<0.001
